# Supplementary material for: Towards robust seasonal streamflow forecasts in mountainous catchments: impact of calibration metric selection in hydrological modeling
Source: Copernicus journal article supplement (doi:10.5194/hess-27-4385-2023), 2023-12-14
Supplement: Supplementary file 1 [file hess-27-4385-2023-supplement.pdf]

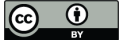

*Supplement of*

**Towards robust seasonal streamflow forecasts in mountainous catchments: impact of calibration metric selection in hydrological modeling**

**Diego Araya et al.**

*Correspondence to:* Pablo A. Mendoza (pamendoz@uchile.cl)

The copyright of individual parts of the supplement might differ from the article licence.

**Table S1.** Catchment attributes: mean elevation (m a.s.l.; **ME**), area (km<sup>2</sup>, **A**), fraction of basin covered by forest (% **FBCF**), fraction of basin covered by barren land (% **FBCBL**), mean annual temperature (°C, **MAT**), aridity index (-, **AI**), precipitation seasonality (-, **PS**), mean annual precipitation (mm/yr, **MAP**), precipitation falling as snow (% **PFS**), mean annual runoff (mm/yr, **MAR**), baseflow index (-, **BFI**), interannual runoff variability (-, **IRV**).

| Catchment                       | ME   | A    | FBC  | FBCFL | MAT  | AI  | PS    | MAP  | PFS | MAR  | BFI  | IRV  |
|---------------------------------|------|------|------|-------|------|-----|-------|------|-----|------|------|------|
| Pulido en Vertedero             | 3566 | 2022 | 0.0  | 63    | 6.3  | 7.0 | -0.96 | 126  | 36  | 20   | 0.83 | 0.45 |
| Toro antes de junta con la      | 3905 | 467  | 0.0  | 87    | 4.3  | 5.6 | -0.62 | 133  | 50  | 43   | 0.68 | 0.38 |
| La Laguna en Salida             | 4275 | 558  | 0.0  | 78    | 2.6  | 4.3 | 0.71  | 156  | 71  | 104  | 0.77 | 0.65 |
| Derecho en Alcohuz              | 3544 | 338  | 0.1  | 69    | 4.6  | 3.2 | -1.12 | 222  | 64  | 107  | 0.81 | 1.00 |
| Hurtado en Angostura            | 3724 | 672  | 0.1  | 66    | 3.9  | 2.4 | -1.04 | 251  | 70  | 128  | 0.86 | 0.81 |
| Rapel en Junta                  | 2661 | 821  | 0.6  | 34    | 8.7  | 3.0 | -1.05 | 313  | 12  | 71   | 0.67 | 1.30 |
| Grande en las Ramadas           | 3098 | 569  | 0.0  | 67    | 6.7  | 2.9 | -1.12 | 284  | 34  | 202  | 0.78 | 0.89 |
| Grande en Cuyano                | 2726 | 1287 | 0.2  | 49    | 8.8  | 3.6 | -1.21 | 277  | 8   | 147  | 0.75 | 0.96 |
| Choapa en Cuncumén              | 3142 | 1132 | 0.2  | 64    | 6.0  | 2.7 | -1.18 | 318  | 53  | 236  | 0.75 | 0.74 |
| Pederal en Tajada               | 2454 | 81   | 0.1  | 27    | 9.6  | 2.8 | -1.25 | 355  | 3   | 89   | 0.65 | 1.06 |
| Sobrante en Piñadero            | 2610 | 241  | 0.2  | 40    | 8.3  | 2.3 | -1.21 | 397  | 13  | 90   | 0.78 | 1.15 |
| Alicahue en Colliguay           | 2403 | 348  | 0.2  | 37    | 9.1  | 2.5 | -1.18 | 391  | 7   | 94   | 0.78 | 1.06 |
| Aconcagua en Chacabuquito       | 3178 | 2113 | 0.3  | 66    | 5.3  | 1.9 | -1.16 | 390  | 52  | 448  | 0.76 | 0.52 |
| Pocuro en el Sifón              | 2006 | 181  | 0.2  | 20    | 11.1 | 2.5 | -1.22 | 445  | 1   | 124  | 0.72 | 0.79 |
| Arrayán en la Montosa           | 2513 | 216  | 0.4  | 50    | 8.1  | 1.6 | -1.15 | 560  | 18  | 207  | 0.75 | 0.63 |
| Yerba Loca antes de junta con   | 3424 | 110  | 0.2  | 70    | 3.3  | 1.2 | -1.13 | 456  | 72  | 278  | 0.75 | 0.44 |
| Maipo en el Manzano             | 3181 | 4839 | 0.2  | 69    | 5.0  | 0.9 | -1.12 | 764  | 59  | 605  | 0.81 | 0.35 |
| Claro en el Valle               | 1605 | 349  | 27.1 | 20    | 10.7 | 0.8 | -1.16 | 1297 | 1   | 702  | 0.63 | 0.59 |
| Claro en los Queñes             | 1857 | 354  | 14.6 | 36    | 8.9  | 0.6 | -1.11 | 1568 | 8   | 1527 | 0.70 | 0.41 |
| Colorado en junta con Palos     | 2288 | 878  | 11.5 | 57    | 7.1  | 0.5 | -1.09 | 1650 | 23  | 1526 | 0.73 | 0.38 |
| Palos en junta con Colorado     | 1973 | 490  | 16.7 | 55    | 8.1  | 0.5 | -1.07 | 1743 | 14  | 1532 | 0.80 | 0.32 |
| Sauces antes de junta con Ñuble | 1683 | 607  | 9.8  | 20    | 8.3  | 0.6 | -1.04 | 1752 | 10  | 1581 | 0.68 | 0.36 |

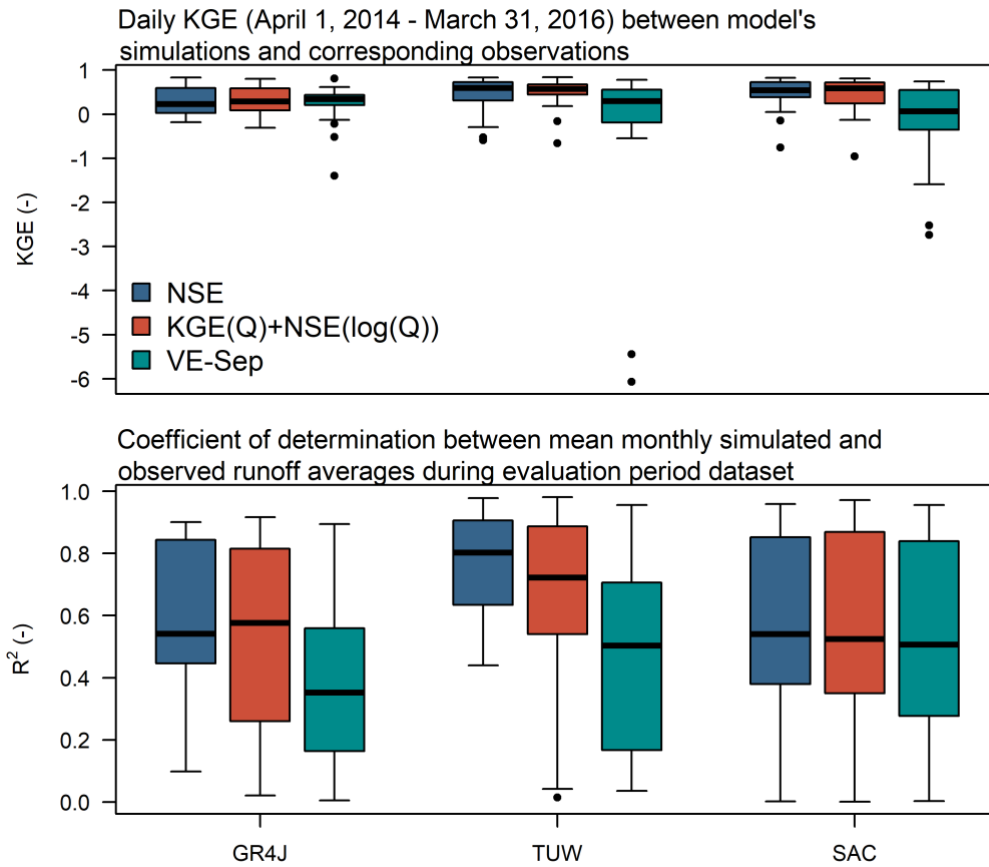

**Figure S1.** Kling-Gupta Efficiency (KGE) between simulated and observed daily streamflow for the period April/2014-March/2016, using parameter values obtained with different calibration objective functions and hydrological models (upper panel); and coefficient of determination ( $R^2$ ) between mean monthly simulated and observed runoff averages for the evaluation dataset (April/1987 – March/1994 and April/2013 – March/2020, bottom panel). Each boxplot comprises results from the 22 case study basins. The boxes correspond to the interquartile range (IQR, i.e., 25<sup>th</sup> and 75<sup>th</sup> percentiles), the horizontal line in each box is the median, and the whiskers extend to the  $\pm 1.5 \cdot IQR$  of the ensemble. The points correspond to outliers beyond the whiskers' range.

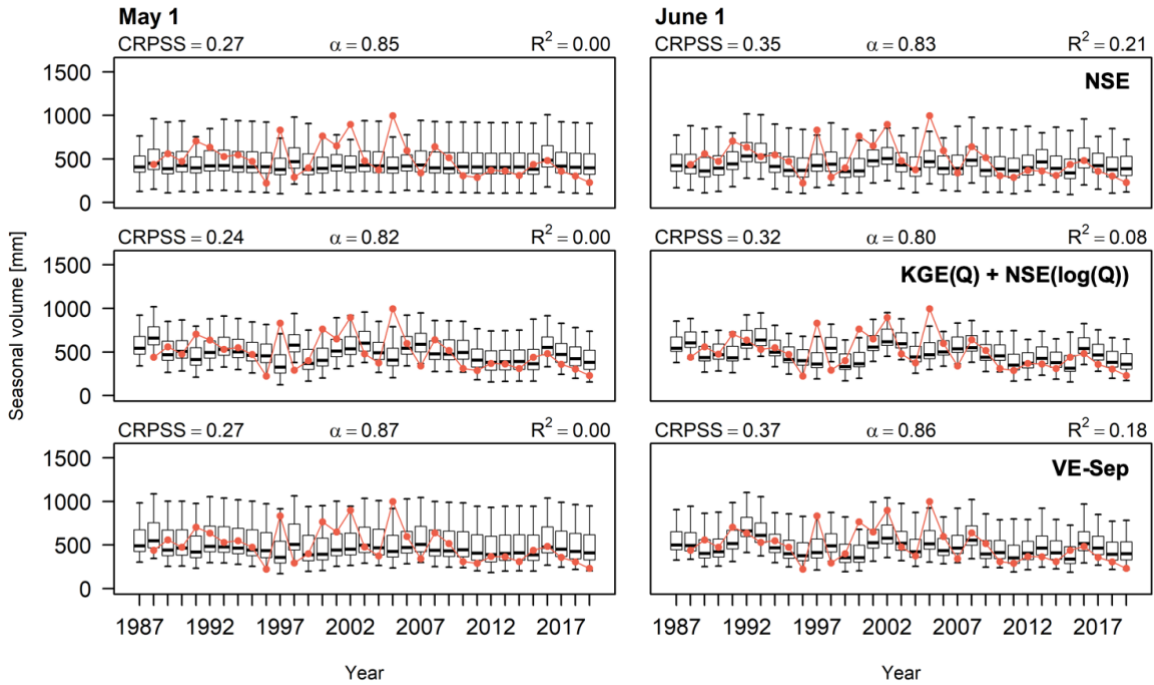

**Figure S2.** Time series with ESP seasonal hindcasts (i.e., September-March runoff) initialized on May 1 (left panels), and June 1 (right panels) for the Maipo at El Manzano basin. The boxes correspond to the interquartile range (IQR, i.e., 25<sup>th</sup> and 75<sup>th</sup> percentiles); the horizontal line in each box is the median, whiskers extend to the  $\pm 1.5 \cdot IQR$  of the ensemble, and the red dots represent the observations. The results were produced with the TUW model, using parameters obtained from calibrations conducted with NSE, KGE(Q)+NSE(log(Q)) and VE-Sep. Each panel displays the CRPSS, the reliability index  $\alpha$ , and the coefficient of determination  $R^2$  (computed using the ensemble forecast median).

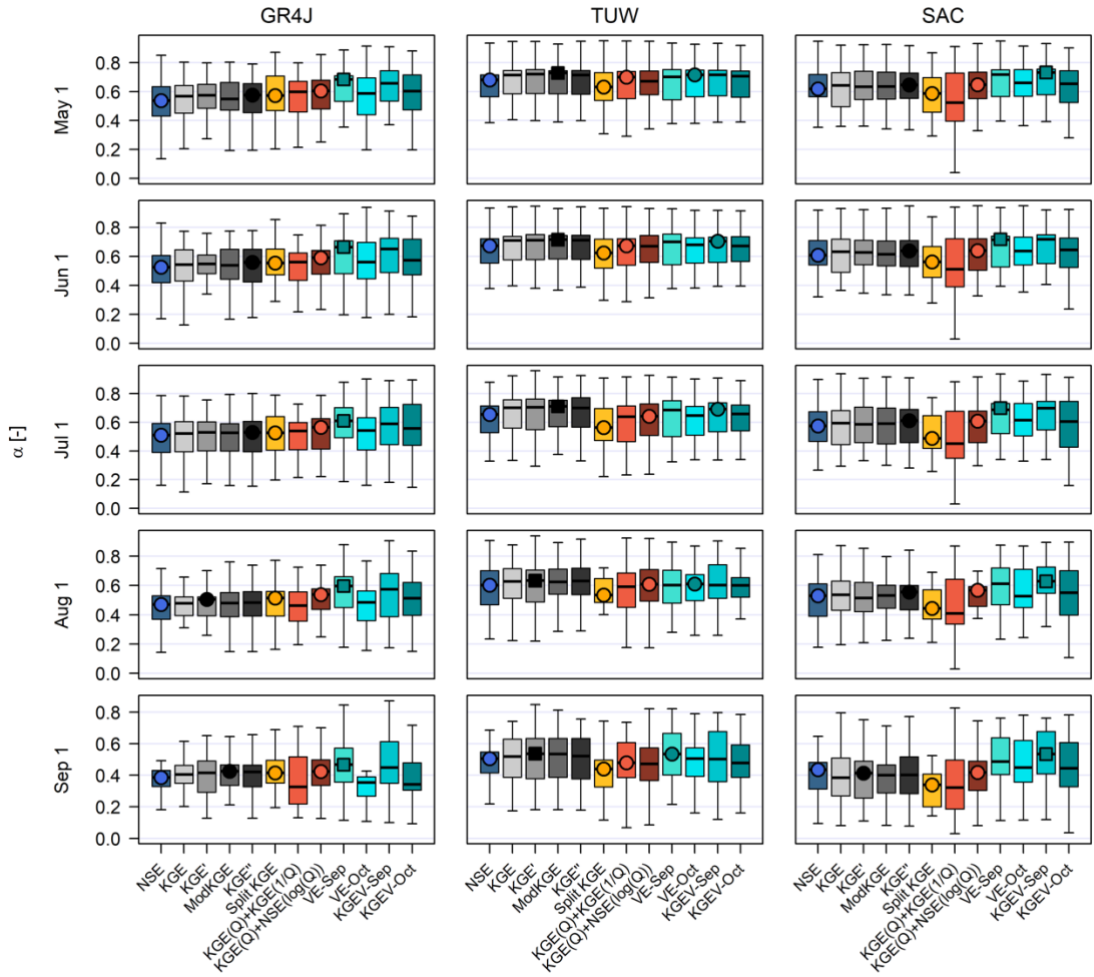

**Figure S3.** Comparison of the  $\alpha$  reliability indices obtained with different calibration objective functions. Each panel contains results for a specific combination initialization time (rows) and hydrological model (columns), and each boxplot comprises results from the 22 case study basins. The boxes correspond to the interquartile range (IQR, i.e., 25<sup>th</sup> and 75<sup>th</sup> percentiles), the horizontal line in each box is the median, and whiskers extend to the  $\pm 1.5 \cdot IQR$  of the ensemble. The circle indicates the objective function providing the highest median within each family of calibration metric (identified with different colors), and the square indicates the objective function that delivers the best set of metric values using a specific combination of initialization time and hydrological model.

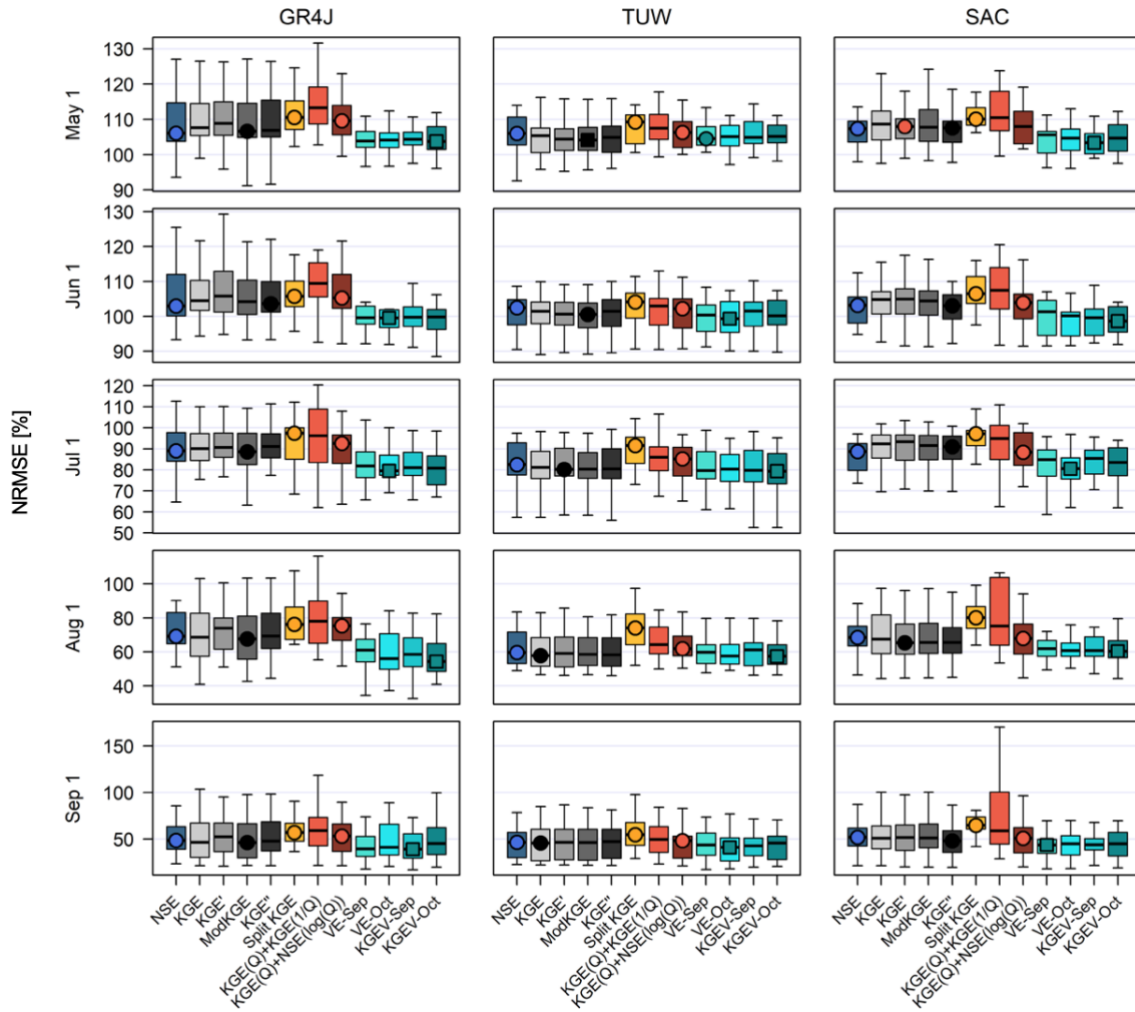

Figure S4. Same as in Figure S3, but for NRMSE.

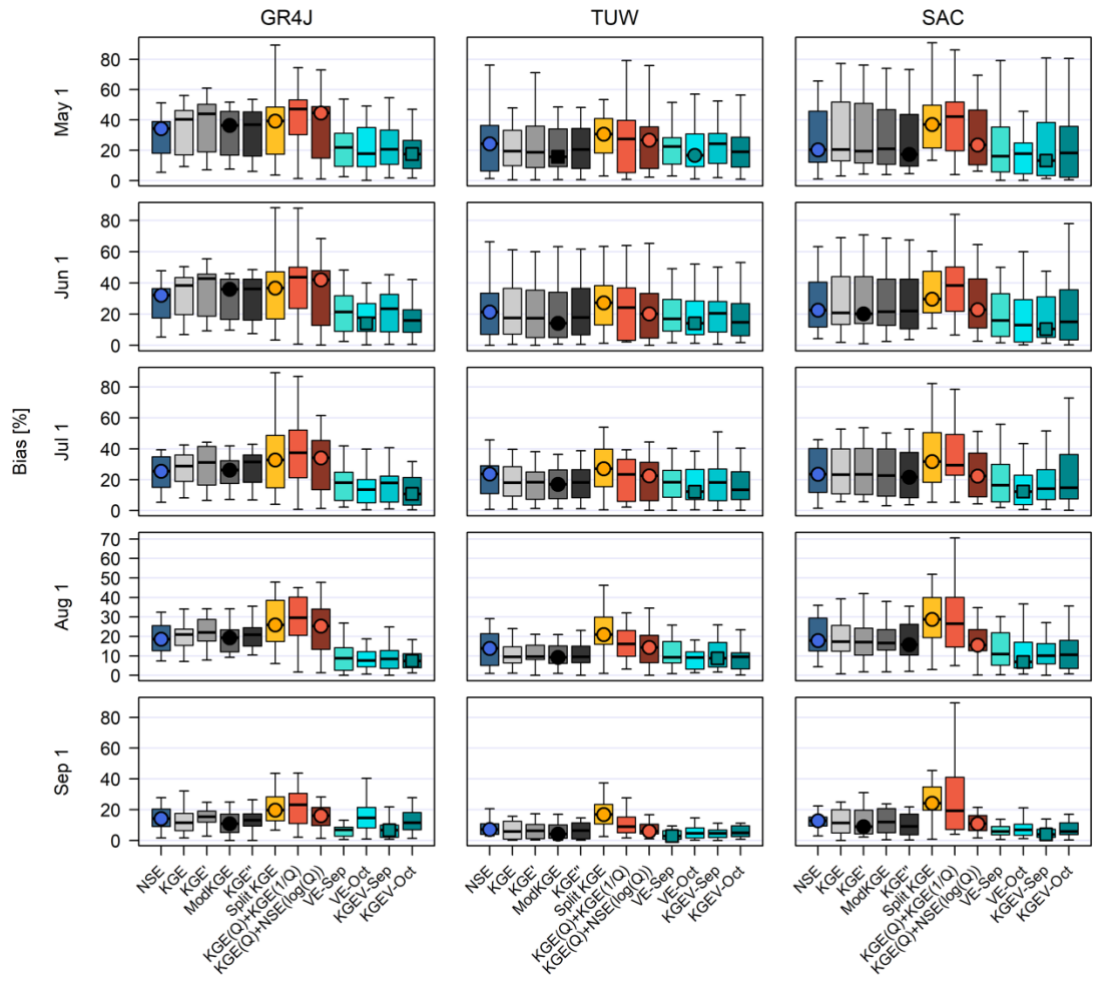

Figure S5. Same as in Figure S3, but for the percent bias.

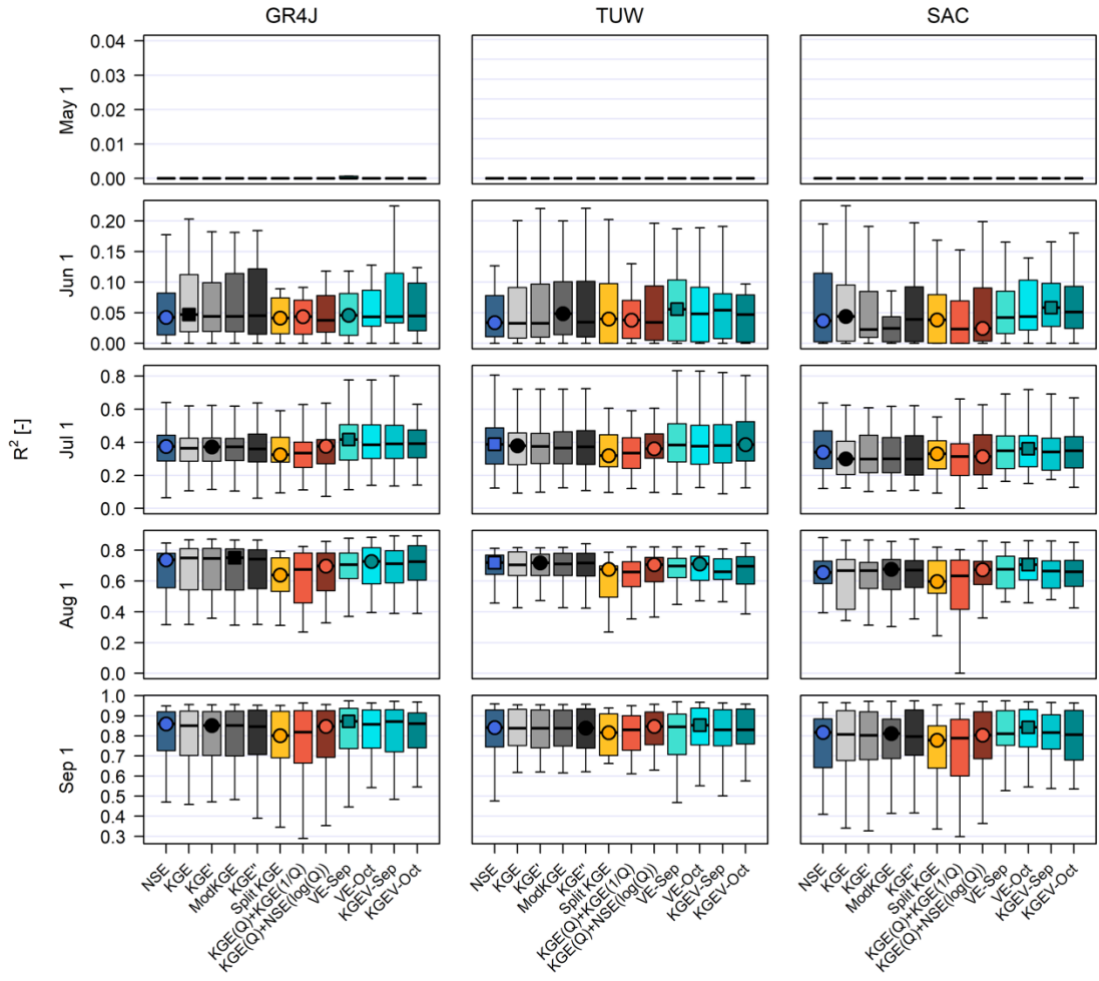

Figure S6. Same as in Figure S3, but for  $R^2$ .



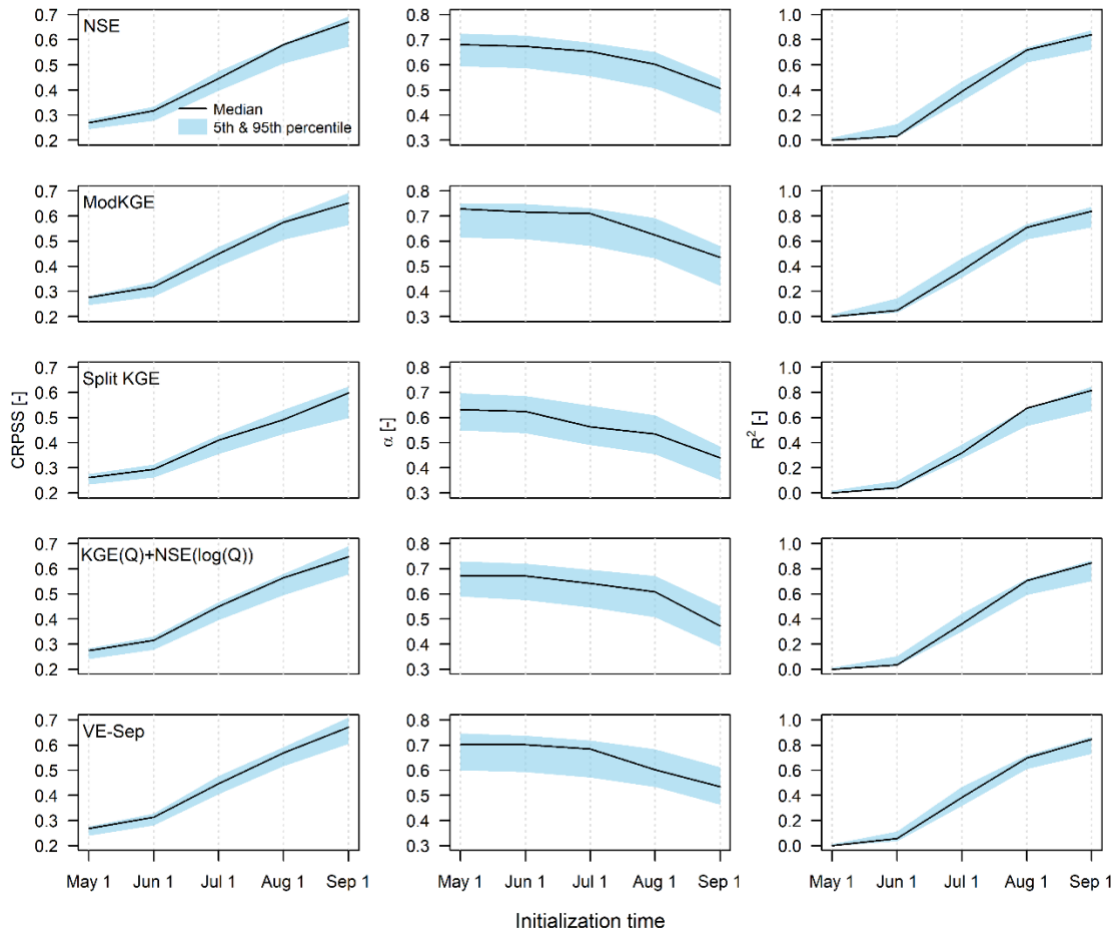

**Figure S7.** Impact of initialization time on hindcast performance using NSE, ModKGE, Split KGE, KGE(Q)+NSE(log(Q)) and VE-Sep as calibration metrics with the TUW model. The shades represent the 5th and 95th percentiles in each metric from the 22 case study catchments, and the solid line represents the median of each metric.

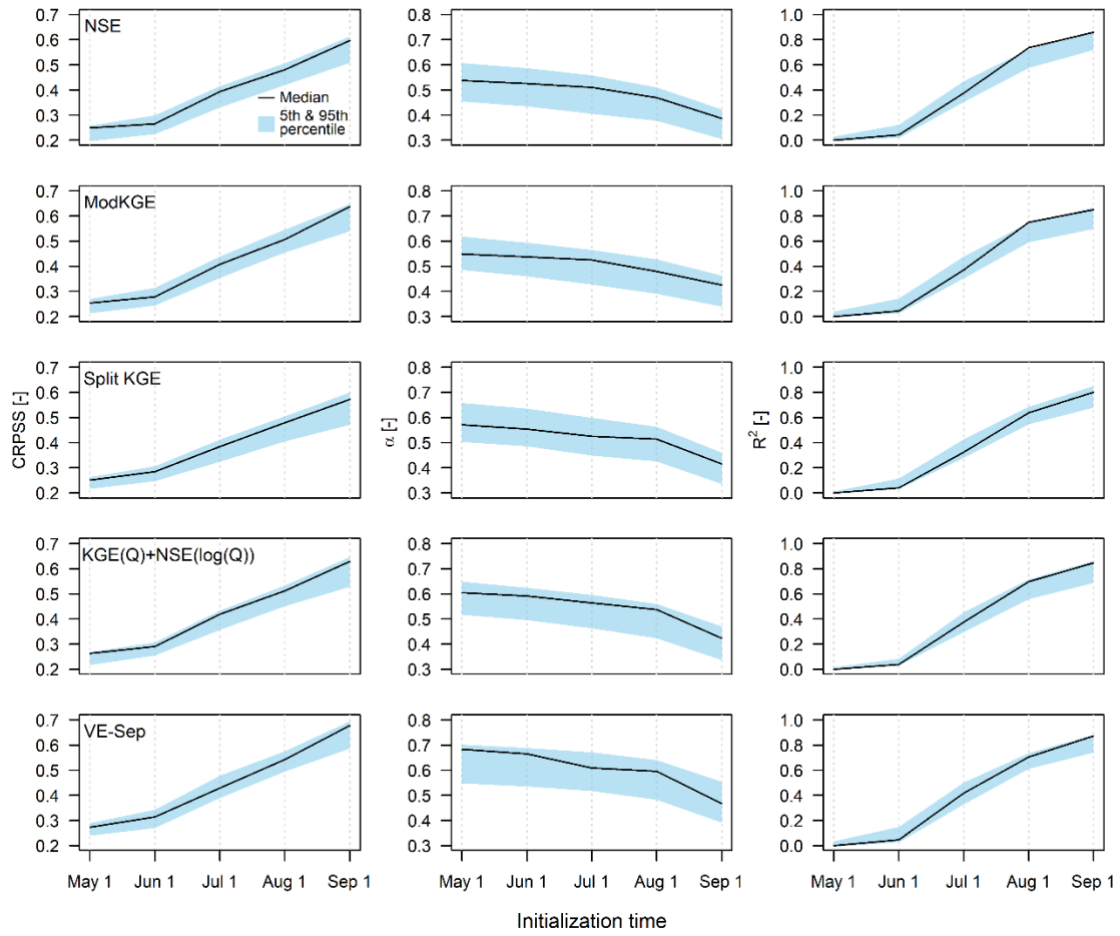

**Figure S8.** Same as in Figure S7, but for the GR4J model.

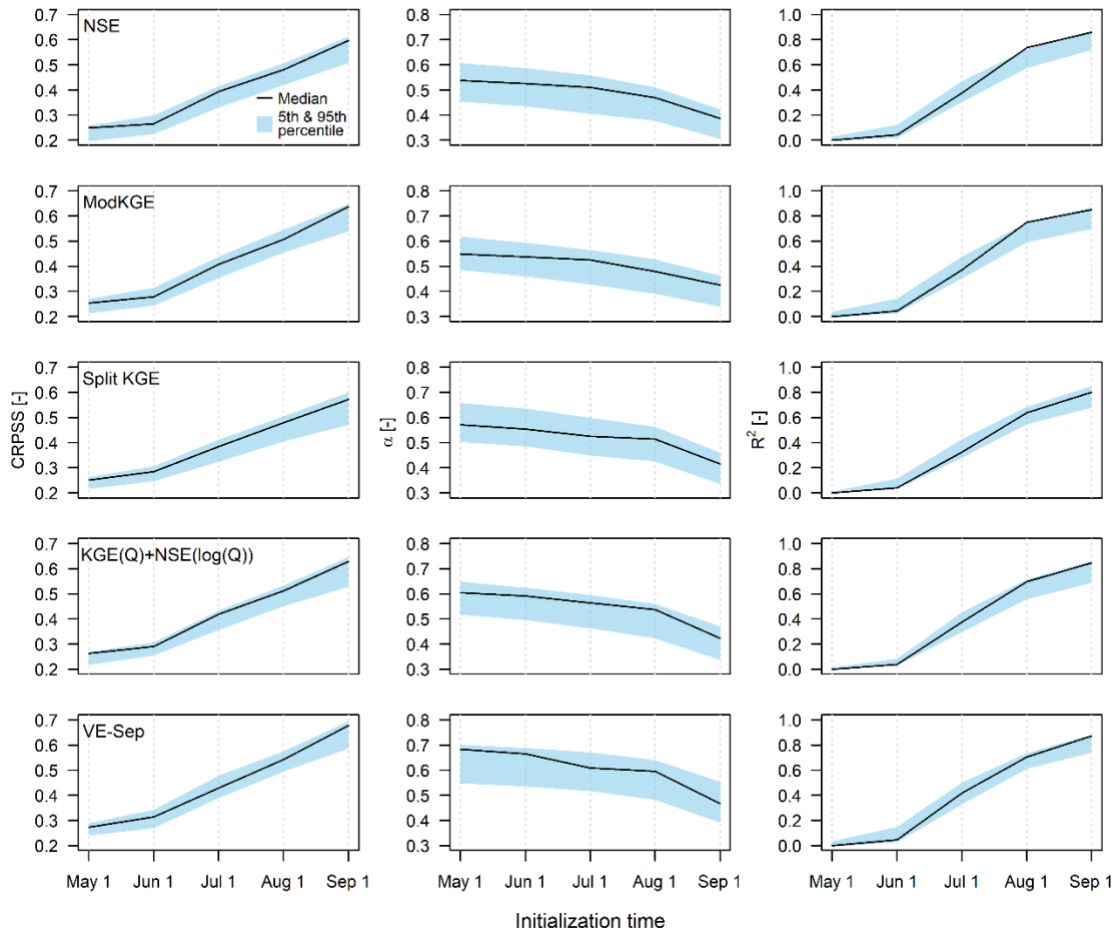

**Figure S9.** Same as in Figure S7, but for the SAC-SMA model.

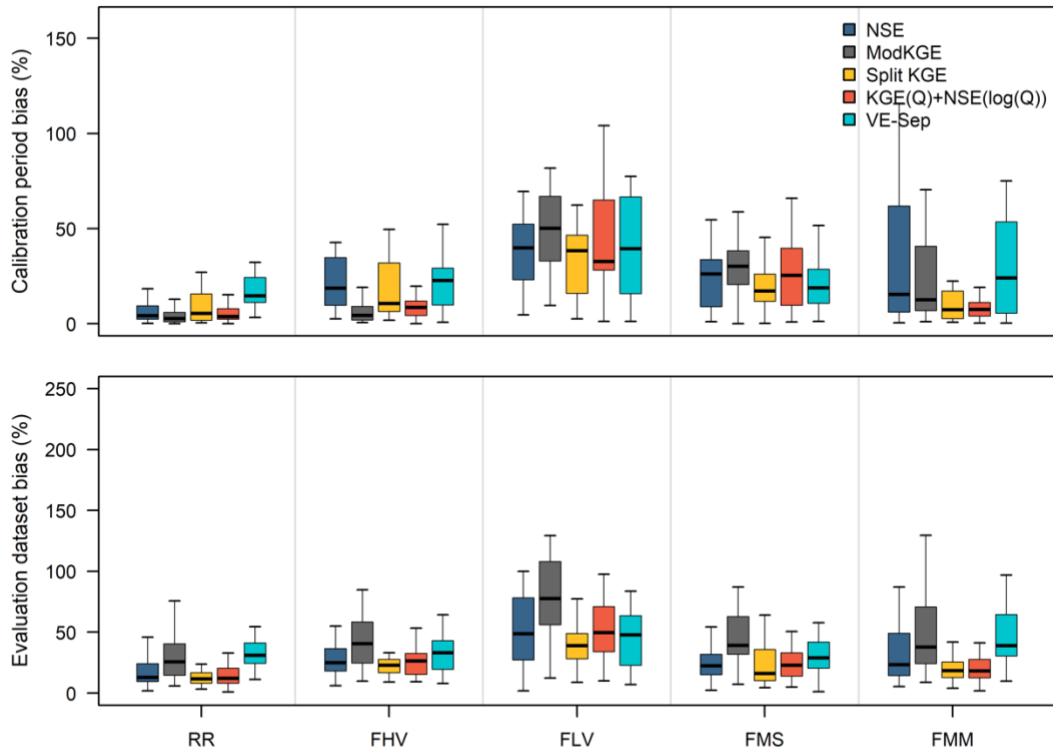

**Figure S10.** Percent biases (y-axis) in hydrological signatures (x-axis) obtained with the five representative objective functions and the GR4J model for the (upper panel) calibration (April/1994 – March/2013) and (bottom panel) evaluation dataset (April/1987 – March/1994 and April/2013 – March/2020). Each boxplot comprises results for our 22 case study basins. The boxes correspond to the interquartile range (IQR, i.e., 25<sup>th</sup> and 75<sup>th</sup> percentiles), the horizontal line in each box is the median, and whiskers extend to the  $\pm 1.5 \cdot IQR$  of the ensemble.

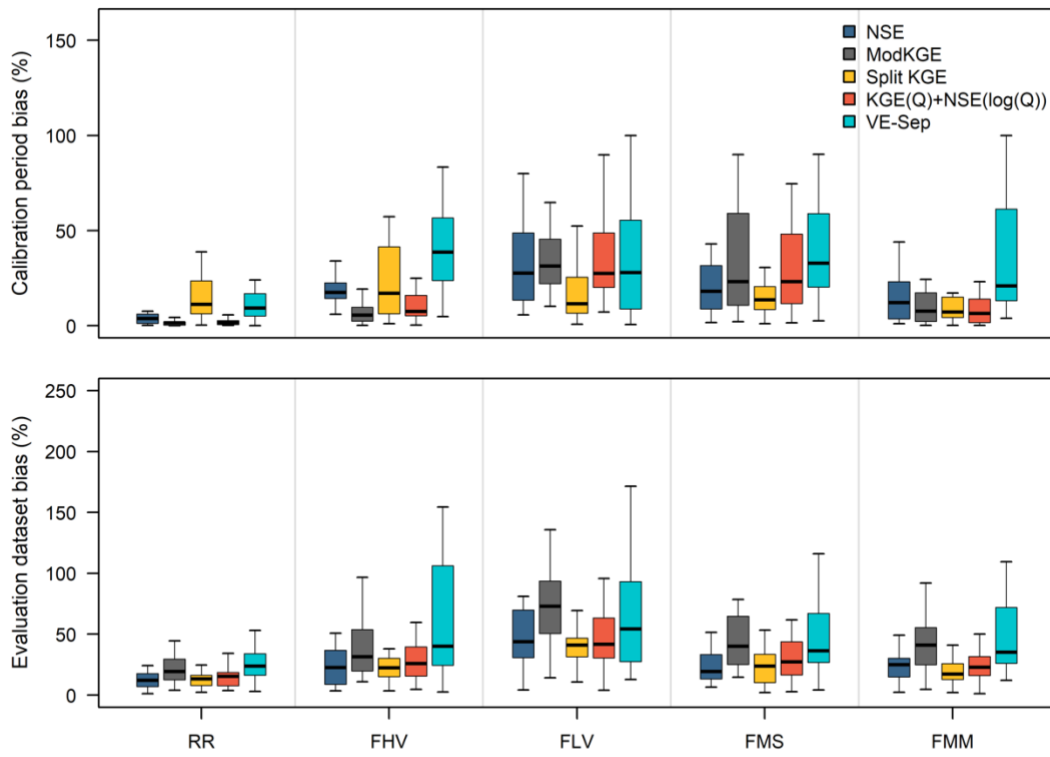

Figure S11. Same as in Figure S10, but for SAC-SMA model.

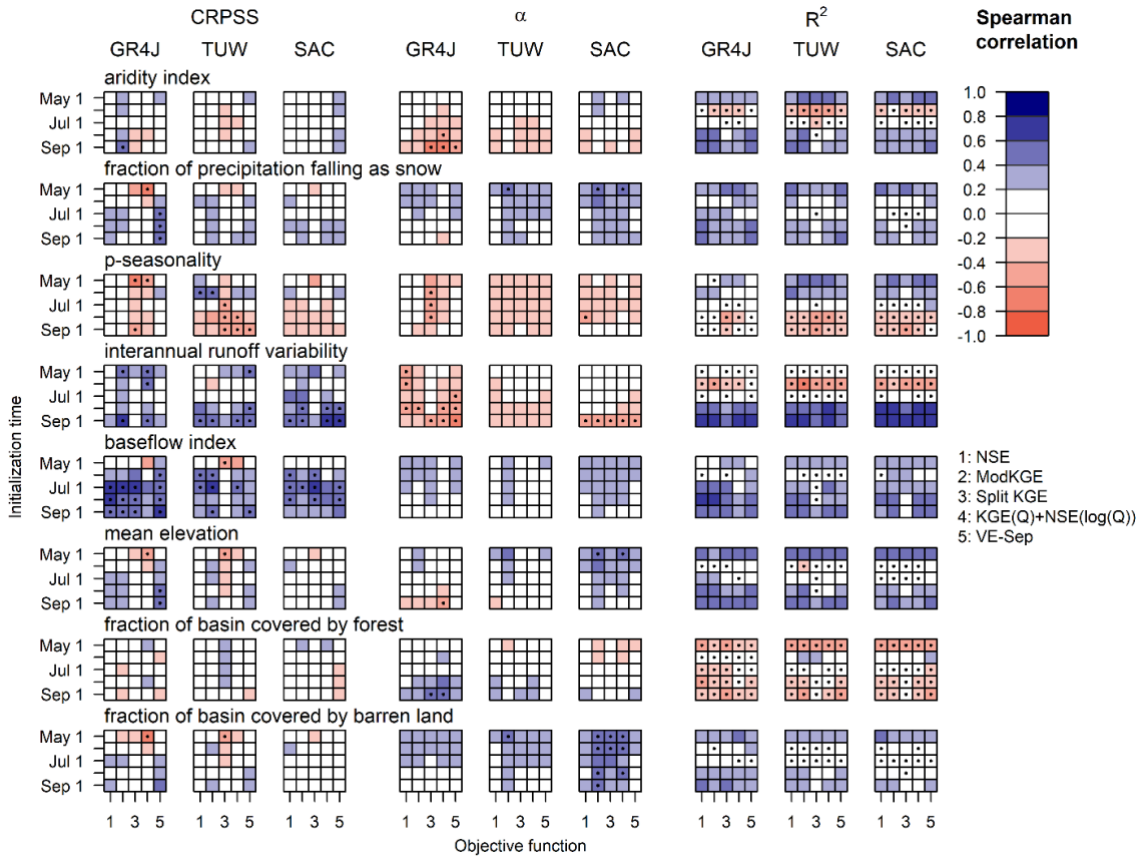

**Figure S12.** Spearman’s rank correlation coefficients between catchment characteristics (shown in different rows) and the CRPSS (left),  $\alpha$  reliability index (center), and the coefficient of determination  $R^2$  (right) obtained for seasonal streamflow hindcasts (period April/1987 – March/2020), produced with the five representative objective functions (x-axis in each color matrix), different initialization times (y-axis in each color matrix), and the three hydrological models. Black dots indicate statistically significant ( $p < 0.05$ ) correlations.
